# Supplementary material for: Using the Movember Foundation’s GAP3 cohort to measure the effect of active surveillance on patient-reported urinary and sexual function—a retrospective study in low-risk prostate cancer patients
Source: PubMed Central journal article supplement — Transl Androl Urol. 2021 Jun;10(6):2719–27. doi: 10.21037/tau-20-1255 (PMC8261406; doi:10.21037/tau-20-1255), 2021-06
Supplement: tau-10-06-2719-dss.pdf [file tau-10-06-2719-dss.pdf]

## Data Sharing Statement

|                     |                                                                                                                                                    |                                                                                                                                                                                                                                                                                                                                                                                                                                                                                                           |
|---------------------|----------------------------------------------------------------------------------------------------------------------------------------------------|-----------------------------------------------------------------------------------------------------------------------------------------------------------------------------------------------------------------------------------------------------------------------------------------------------------------------------------------------------------------------------------------------------------------------------------------------------------------------------------------------------------|
| <b>Article Info</b> | http://dx.doi.org/10.21037/tau-20-1255                                                                                                             |                                                                                                                                                                                                                                                                                                                                                                                                                                                                                                           |
| <b>Item</b>         | <b>Question</b>                                                                                                                                    | <b>Authors' Response<br/>(place "-" if not applicable)</b>                                                                                                                                                                                                                                                                                                                                                                                                                                                |
| 1                   | Would you like to share data collected for your study to others?                                                                                   | No                                                                                                                                                                                                                                                                                                                                                                                                                                                                                                        |
| 2                   | If not, would you like to share the reason for your decision?                                                                                      | For privacy reasons it has been agreed within the GAP3 consortium that the central database can only be accessed by GAP3 statisticians and the data has to remain within the GAP3 analytical environment.                                                                                                                                                                                                                                                                                                 |
| 3                   | What data in particular will be shared?                                                                                                            | -                                                                                                                                                                                                                                                                                                                                                                                                                                                                                                         |
| 4                   | Any other documents will be share? Such as study protocol, statistical analysis plan, informed consent form, clinical study report, analytic code. | No                                                                                                                                                                                                                                                                                                                                                                                                                                                                                                        |
| 5                   | When will data availability begin?                                                                                                                 | -                                                                                                                                                                                                                                                                                                                                                                                                                                                                                                         |
| 6                   | When will data availability end?                                                                                                                   | -                                                                                                                                                                                                                                                                                                                                                                                                                                                                                                         |
| 7                   | To whom will you share the data?                                                                                                                   | -                                                                                                                                                                                                                                                                                                                                                                                                                                                                                                         |
| 8                   | For what type of analysis or purpose?                                                                                                              | -                                                                                                                                                                                                                                                                                                                                                                                                                                                                                                         |
| 9                   | How or where can the data/documents be obtained?                                                                                                   | Data will not be shared, however, (External) researchers can send in a research proposal that if approved can be executed in collaboration with the GAP3 consortium. Statistical analysis will always be done by GAP3 statisticians.<br>(for more information contact GAP3 coordinators: <a href="mailto:j.helleman@erasmusmc.nl">j.helleman@erasmusmc.nl</a> , <a href="mailto:m.roobol@erasmusmc.nl">m.roobol@erasmusmc.nl</a> , <a href="mailto:c.h.bangma@erasmusmc.nl">c.h.bangma@erasmusmc.nl</a> ) |

|    |                         |    |
|----|-------------------------|----|
| 10 | Any other restrictions? | No |
|----|-------------------------|----|
